# Supplementary material for: Theoretical investigation of the magnetic and optical properties in a transition metal-doped GaTeCl monolayer
Source: Royal Society of Chemistry journal article supplement (doi:10.1039/d3cp02313c), 2023-01-01
Supplement: d3cp02313c1.pdf [file d3cp02313c1.pdf]

## Theoretical investigation of magnetic and optical properties in transition metal doped GaTeCl monolayer

Pengxia Zhou,<sup>#\*a</sup> Ziheng Pan,<sup>#a</sup> Qian Gao,<sup>a</sup> Qian Zou,<sup>a</sup> Jieru Sun,<sup>a</sup> Yinxin Li,<sup>a</sup> You  
Qian,<sup>a</sup> Shang Li,<sup>a</sup> Chonggui Zhong,<sup>\*a,b</sup> Lihua Qu,<sup>a</sup> Zhengchao Dong.<sup>a</sup>

<sup>a</sup>School of science, Nantong University, 226007

<sup>b</sup>School of Physical Science and Technology, Soochow University, Suzhou, 215006

<sup>#</sup>these authors contributed equally to this work.

\*Corresponding author. Email: [ntzhoupx@ntu.edu.cn](mailto:ntzhoupx@ntu.edu.cn) or [chgzhong@ntu.edu.cn](mailto:chgzhong@ntu.edu.cn)

### Supplementary Materials

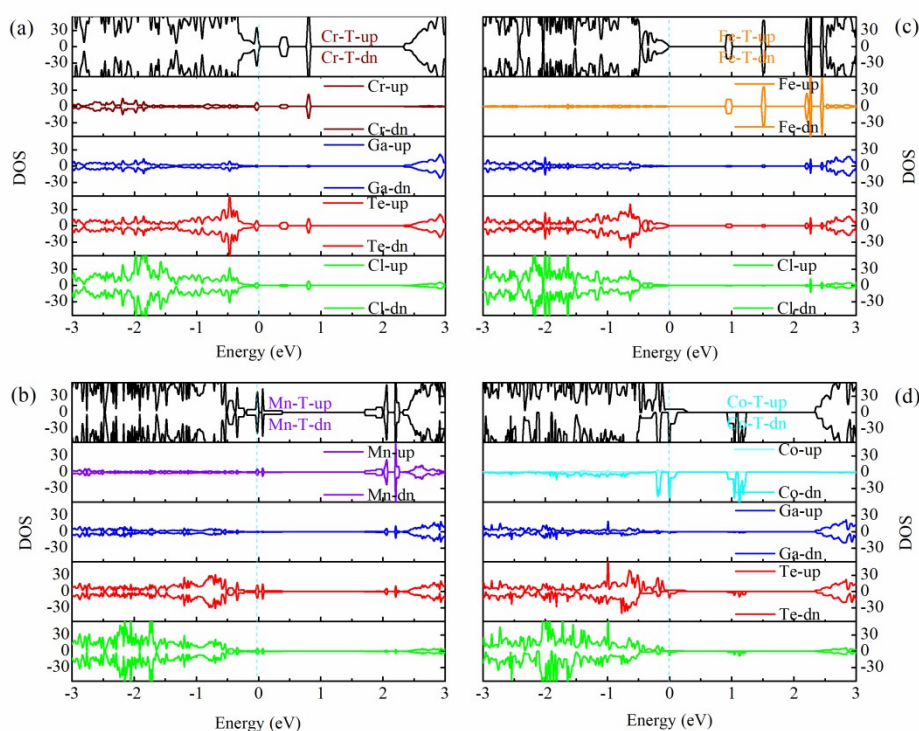

Fig. S1. (Color online) The total density of states (DOS) and projected DOS (PDOS) of (a) C-AFM Cr@GaTeCl, (b) A-AFM Mn@GaTeCl, (c) C-AFM Fe@GaTeCl, (d) FM Co@GaTeCl. Here, 0 eV denotes the Fermi energy, M-T-up (or dn) represent those total DOS of M@GaTeCl, the positive and negative of DOS correspond to the up spin state and down spin state respectively.

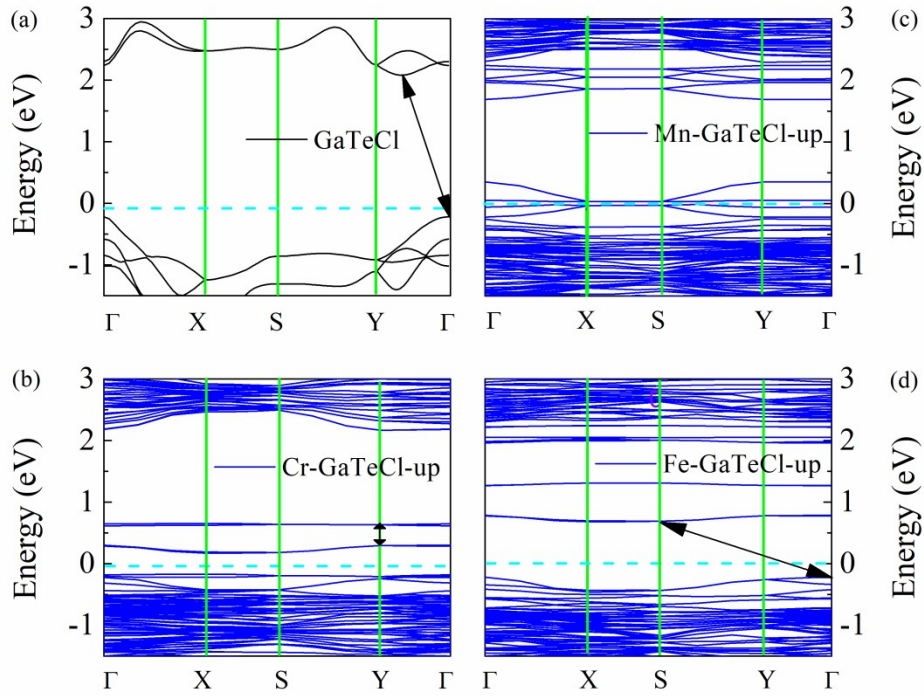

Fig. S2. (Color online) Band structures of GaTeCl and M@GaTeCl (M= Cr, Mn and Fe), (a) GaTeCl monolayer, (b) spin up Cr@GaTeCl, (c) spin up Mn@GaTeCl, (d) spin up Fe@GaTeCl. The black double arrow line denotes the K points of CBM and VBM of the system. For Mn@GaTeCl the K points of CBM and VBM are located between  $\Gamma$  and X points near Fermi energy. Due to that the spin up band structure is the same to the spin down one in the AFM M@GaTeCl systems (M = Cr, Mn, Fe and V), here, we only show the spin up band structure.
